## **Pre-pandemic humoral immunity to SARS-CoV-2 in Africa: systematic review and meta-analysis**

John P.A. Ioannidis, MD, DSc<sup>1</sup>, Despina G. Contopoulos-Ioannidis, MD<sup>2</sup>

1 Departments of Medicine, of Epidemiology and Population Health, of Biomedical Data Sciences, and of Statistics, and Meta-Research Innovation Center at Stanford (METRICS), Stanford University, Stanford CA, USA

2 Division of Pediatric Infectious Diseases, Department of Pediatrics, Stanford University School of Medicine, Stanford, CA, USA

Correspondence: John P.A. Ioannidis, MD, DSc, 1265 Welch Rd, SPRC, Medical School Office Building X306, Stanford, CA 94305, USA E-mail: [jioannid@stanford.edu](mailto:jioannid@stanford.edu) .

3464 words; 3 tables; 2 figures; supplement: references, 5 tables; abstract: 299 words

## **SUMMARY (299 words)**

**Background:** Low numbers of recorded COVID-19 deaths in Africa may be due to undercounting and/or protection due to demographic and/or other factors, including pre-existing immunity. Several studies have assessed pre-pandemic samples for anti-SARS-CoV-2 antibodies with heterogeneous results.

**Methods:** We performed a systematic review and meta-analysis of studies evaluating pre-pandemic African samples for anti-SARS-CoV-2 antibody activity using pre-set assay-specific thresholds for seropositivity. Data where assay thresholds were calibrated on African populations were excluded. Searches used PubMed (September 13, 2022), reference lists of retrieved papers and citing articles (Google Scholar). Data were extracted independently by two authors on study and assay characteristics, and number of positive and tested samples. Datasets were classified according to malaria, dengue, and HIV burden. Proportions of seropositivity were combined with random effects meta-analysis.

**Results:** 22 articles with 117 datasets were eligible, including 2,971 positives among 21,988 measurements (13.5%) with large between-dataset heterogeneity. Positivity was higher for anti-S1 (25%) and lower for anti-RBD antibodies (8%). Positivity was non-significantly higher for IgM than for IgG antibodies. Positivity was seen prominently in countries where malaria transmission occurs throughout and in datasets enriched in malaria cases (17%, 95% CI, 15-19%) versus 1%, 95% CI 0-2% in other datasets). There were modest differences according to dengue burden (15% versus 11%). Substantial SARS-CoV-2 reactivity was seen in high malaria burden with or without high dengue burden (seropositivity 19% and 12%, respectively), and not without high malaria burden (seropositivity 2% and 0% with and without high dengue burden, respectively). There were modestly lower proportions of positivity in datasets with >10% of

HIV-infected participants (8% versus 15% in others), but no association according to HIV serostatus in individual samples (summary odds ratio 0.97, 95% CI, 0.55-1.70).

**Interpretation:** Pre-pandemic samples from Africa show high levels of anti-SARS-CoV-2 seropositivity that tracks especially with malaria.

**Funding:** None

## **RESEARCH IN CONTEXT**

### **Evidence before this study**

Several studies have evaluated the presence of antibodies cross-reactive to SARS-CoV-2 in samples collected before the COVID-19 pandemic from African locations. Positivity rates have varied substantially and different hypotheses have been raised about the correlates, causes, and clinical implications of this pre-existing humoral immunity. A search in PubMed and Google Scholar did not identify, however, any systematic review and meta-analysis of existing studies.

### **Added value of this study**

A formal systematic review and meta-analysis identified 22 studies with 117 datasets from pre-pandemic samples from Africa and found that on average 1 of 7 samples had anti-SARS-CoV-2 antibody activity, with large between-dataset heterogeneity. The strongest factor correlating with high positivity rates was malaria, while associations with dengue and HIV were not strong and were probably confounded.

### **Implications of all the available evidence**

Further studies should examine whether pre-existing immunity is related to the lower recorded COVID-19 deaths in settings with high malaria burden. The broader spectrum of immune response in pre-pandemic samples, including both humoral and cellular immunity, should also be carefully dissected.

## INTRODUCTION

The number of recorded COVID-19 deaths in Africa during the pandemic has been very small compared with other continents. A wide range of explanations has been proposed,<sup>1</sup> ranging from favorable population features (very young, low obesity rates) to speculations that deaths may have been undercounted in Africa due to limited testing.<sup>2</sup> One of the most tantalizing hypotheses has been that pre-existing immunity to SARS-CoV-2 may account for less severe clinical outcomes and fewer fatalities. Impetus for this hypothesis has been provided by several studies documenting humoral immunity to SARS-CoV-2 in African samples that predate the pandemic years.<sup>3-12</sup> This pattern has typically not been seen in populations from highly developed countries and its provenance remains elusive. This detected immunity does not seem to represent cross-reactivity of immune responses to known endemic coronaviruses that are extremely widely, practically ubiquitously, distributed across all continents. There have been speculations whether detected anti-SARS-CoV-2 antibodies represent prior exposure to some other, yet unknown, coronavirus bearing similarity to SARS-CoV-2, or may be related to exposure to other infectious pathogens widespread in Africa, in particular *Plasmodium*, dengue and HIV.

African studies on this matter have used very diverse sources of pre-pandemic samples in various countries. They have also used different antibody assays for various antibody types and SARS-CoV-2 antigenic targets. There are conflicting hints on whether cross-reactivity may pertain mostly to specific antibody types and antigenic targets. Some studies have also explored different correlations between the presence of anti-SARS-CoV-2 antibodies and markers of various other infectious diseases. While each of them offers a limited picture, a systematic examination may offer some more concrete insights. Important questions to answer are: how

frequently are antibodies to SARS-CoV-2 detected in pre-pandemic African samples, how much heterogeneity exists on their prevalence, and whether heterogeneity may be explained by the assay and type of antibodies assessed, each country's endemicity for *Plasmodium* and dengue, HIV infection rates, and any other associations with infectious pathogens. This systematic review and meta-analysis aimed to answer these questions.

## **METHODS**

### **Protocol**

The protocol was preregistered in OSF (<https://osf.io/f5g76/>).

### **Eligible studies**

Eligible studies were those that evaluated samples collected in African countries before December 2019, i.e. in the pre-pandemic period, for humoral responses to SARS-CoV-2 in blood (plasma or serum). Any type of antibody and any type of assay thereof was eligible. Studies were eligible if they used pre-set assay-specific thresholds of antibody titers for claiming positive results. Studies that measured antibodies in other body fluids (e.g., milk) were excluded. Studies that calibrated the assay threshold so as to make it appropriate for use in African populations by setting the specificity at a desired level were excluded; however, if these studies presented also specificity results according to an original pre-set threshold (based on previous work on other, non-African populations), the estimates of specificity based on the pre-set threshold were eligible. Similarly, studies that used assays that were previously calibrated so as to have a desirable level of specificity in African samples were excluded. Furthermore, studies that considered only pre-pandemic samples that were already screened to be negative for anti-SARS-CoV-2 antibodies based on some other SARS-CoV-2 antibody assay were excluded. For studies that included both African and other continent samples from the pre-pandemic era, only the

former were eligible, and data were thus considered only if the African set could be separated.

We did not consider neutralizing antibody assays, as it has been clearly shown that detected antibodies in pre-pandemic African samples typically do not have neutralizing capacity.<sup>13,14</sup>

### **Search strategies**

PubMed was searched (last update September 13, 2022) with the following search string: (Nigeria OR Ethiopia OR Egypt OR Congo OR Tanzania OR South Africa OR Kenya OR Uganda OR Sudan OR Algeria OR Morocco OR Angola OR Mozambique OR Ghana OR Madagascar OR Cameroon OR Cote d'Ivoire OR Niger OR Burkina Faso OR Mali OR Malawi OR Zambia OR Senegal OR Chad OR Somalia OR Zimbabwe OR Guinea OR Rwanda OR Benin OR Burundi OR Tunisia OR South Sudan OR Togo OR Sierra Leone OR Libya OR Liberia OR Central African Republic OR Mauritania OR Eritrea OR Namibia OR Gambia OR Botswana OR Gabon OR Lesotho OR Guinea-Bissau OR Africa OR African) AND (pre-pandemic OR prepandemic OR cross-reactiv\* OR seroprevalence OR negative samples OR negative controls OR (specificity AND test) OR (specificity AND antibod\*)) AND (COVID-19 OR SARS-CoV-2). We also searched the reference lists of the retrieved eligible papers and searched in Google Scholar the articles that cite the retrieved eligible papers in order to identify and additional relevant eligible papers.

### **Data extraction**

From each eligible paper, we extracted the following information: first author, publication venue, African county(ies) from which pre-pandemic samples were obtained, sample size (per country and per cohort, if many countries/cohorts were assessed), provenance of the samples and any information about the sampling process, time periods when they were collected, age information; type of SARS-COV-2 assays and of antibodies measured, including

manufacturer or laboratory of provenance, type of antibody (IgG, IgM, IgA, combinations, all antibodies) and antigenic targets (spike S, S1 subunit, S2 subunit, nucleocapsid N, receptor binding domain RBD, receptor binding motif RBM, other); number and percentage of positive samples for each antibody/assay assessed among total assessed; any borderline readings; any additional information on measurements of indicators of other infectious diseases (*Plasmodium* parasitemia, *Plasmodium* antigens, HIV positivity status, dengue, other) with the potential to generate 2x2 tables for SARS-CoV-2 antibodies against these indicators; and any additional information on relationships between SARS-CoV-2 antibodies and other factors assessed by the authors.

Data extraction was performed in duplicate by two independent assessors who then compared notes and solved discrepancies with discussion.

### **Risk of bias assessment**

The eligible articles were assessed using the Joanna Briggs risk of bias tool for prevalence studies that includes 9 assessment items.<sup>15</sup> The assessment was done by one assessor.

### **Meta-analysis**

The available data on percentage of positive samples with different assays and antigenic targets were combined with meta-analysis. Data were combined separately for each antigenic target using a random effects model.<sup>16</sup>

Heterogeneity was assessed with the chi-square-based Q test and with the  $I^2$  statistic.<sup>17</sup> Borderline readings were considered negative (as also done by the original individual study authors).

Subgroup analyses were performed according to type of antibody (IgG, IgM, IgA, combinations, all antibodies). Moreover, when different types of antibody (e.g. IgG and IgM)



had been assessed with the same assay platform in the same samples, the odds ratio of positivity was determined; if information were given on how many samples were positive with both antibody types (P1P2), how many samples are negative with both antibody types (N1N2), and how many samples are positive with only one of the two antibody types (P1N2, N1P2), the matched McNemar odds ratio was calculated as the ratio P1N2/N1P2.

We also performed subgroup analyses according to country of origin of the samples, classifying countries according to endemicity/burden for malaria, dengue, and rates of HIV infection. For malaria, we used the CDC map of malaria distribution (<https://www.cdc.gov/malaria/about/distribution.html>)<sup>18</sup> separating countries where malaria transmission occurs throughout versus those where no transmission occurs or transmission occurs only in some places. For dengue, we used the Global Consensus 2013 map (<https://www.healthmap.org/dengue/en/>)<sup>19</sup> separating countries where dengue is present or likely from countries where dengue is uncertain, unlikely or absent. For HIV, we considered the eight countries with highest HIV positivity rates (>10% according to [https://en.wikipedia.org/wiki/List\\_of\\_countries\\_by\\_HIV/AIDS\\_adult\\_prevalence\\_rate](https://en.wikipedia.org/wiki/List_of_countries_by_HIV/AIDS_adult_prevalence_rate),<sup>20</sup> i.e. Botswana, Lesotho, Mozambique, Namibia, South Africa, Eswatini, Zambia, and Zimbabwe) versus others. Studies where sampling explicitly aimed to recruit participants based on or heavily enriched in *Plasmodium*, dengue, or HIV infections were considered in the groups with high burden, even if they come from countries without high burden.

Finally, whenever data were available to generate 2x2 tables for the presence of anti-SARS-CoV-2 antibodies and other infectious disease markers or other factors potentially associated with such antibodies, random effects meta-analyses were also performed for the odds ratios of each probed association across the eligible studies that presented sufficient data.

Meta-analyses were conducted in STATASE 15. P-values were considered statistically significant for  $P < 0.005$  and suggestive for values between 0.005 and 0.05.<sup>21</sup>

## RESULTS

### Eligible studies

After screening 38 studies (Figure 1) and excluding 16 (Supplementary references), 22 studies were eligible (18 retrieved from the main search and another 4 retrieved from cited/citation searches).<sup>3-14, 22-31</sup> 19 studies were published in peer-reviewed journals and 3 were preprints. Other studies screened in-depth and excluded are shown in Supplementary References along with the reason for exclusion. Supplementary Table 1 shows the results of the risk of bias assessment.

As shown in Table 1, with one exception participants came from Sub-Saharan Africa. Dataset sample sizes ranged from 19 to 1,077 (sum=21,988). There was also wide variation in the settings of sample collection and eligibility criteria. Five studies included independent cohorts from more than one country and one study included 4 different cohorts from the same country. The total number of cohorts was 38. Most samples were selected between 2016 and 2019, but 8 cohorts had earlier samples (earliest, 1999). Twelve cohorts included only adults, 17 had collected samples from both children and adults, and 2 included only children (7 had unclear age distribution).

As shown in Table 2, there was a large variety of assays used, but most studies used assays of IgG. Most (13/22) studies assessed antibodies against both spike and nucleocapsid antigenic targets. 5 used only antibodies against spike targets and 4 used only antibodies against nucleocapsid targets. In-depth assessments for associations with indicators of infectious pathogens were sparse.

## **Positivity for SARS-CoV-2 antibodies**

Supplementary Table 2 shows the data on the presence of positive results for the assessed SARS-CoV-2 antibodies and variables considered in the subgroup analyses. Overall, 117 datasets among pre-pandemic samples were available for analysis with crude total of 2,971 positives among 21,988 measurements (13.5%). When all 117 datasets were considered in meta-analysis, there was large between-dataset heterogeneity ( $p < 0.001$ ,  $I^2 = 97.2\%$ ) with summary random effects positivity 14% (95% CI, 12-15%).

## **Meta-analysis of positivity per antigenic target and antibody type**

As shown in Table 3, summary positivity was very similar (16%) for anti-N and anti-S antibodies. However, when more specific epitopes within spike were considered, summary positivity was higher for anti-S1 (25%, 95% CI, 19-30%) and lower for anti-RBD antibodies (8%, 95% CI, 6-10%). Lowest positivity was seen for antibodies using both N and S (or subtype) targets (6%, 95% CI, 3-9%). Positivity was non-significantly higher for IgM (summary 16%) than for IgG (summary 13%) antibodies. There was very large between-dataset heterogeneity in all summary estimates ( $p < 0.001$ ), so they should be seen with great caution.

## **Paired comparisons of antibody types**

In 15 datasets, both IgG and IgM had been measured with the same type of assays and antigenic target on the same samples. For 13/15, data on paired measurements in each sample were available (Supplementary Table 3): the summary paired odds ratio was 1.02 (95% CI, 0.86-1.22,  $I^2 = 75\%$ ). Another 2 small datasets had no sufficient data to calculate paired odds ratios.

## **Subgroup analyses for malaria, dengue, and HIV**

As shown in Table 3, anti-SARS-CoV-2 positivity was very different according to malaria status. It was seen prominently in countries where malaria transmission occurs throughout and in datasets enriched in malaria cases (summary estimate 17%, 95% CI, 15-19%), but was almost absent in other datasets (summary estimate 1%, 95% CI, 0-2%). There was still very large between-study heterogeneity in the former group, and less heterogeneity in the latter. Among the 22 datasets in the latter group, positivity was always 0% or very low ( $\leq 8\%$ ) except for one dataset from Tanzania which is a country where malaria transmission does occur throughout in altitudes below 1800 meters.

A higher proportions of anti-SARS-CoV-2 positivity was seen in high dengue burden datasets than others (summary estimates 15% versus 11%), but large between-dataset heterogeneity existed within each group ( $p < 0.001$ ). All the low-dengue datasets with non-negligible positivity came from studies in populations with high levels of malaria. In datasets from three countries with present/likely dengue but malaria transmission not occurring throughout (Tanzania, Madagascar, Ethiopia) the summary positivity rate was only 2% (95% CI, 1-3%). Excluding Tanzania (where, as above, malaria transmission occurs throughout in many parts of the country), estimates for Ethiopia and Madagascar combined were 0% (95% CI, 0-1%) with no between-dataset heterogeneity ( $p = 0.98$ ,  $I^2 = 0\%$ ). Substantial SARS-CoV-2 reactivity was seen practically only in subgroups with high malaria burden with or without high dengue burden (seropositivity 19% and 12%, respectively), not in subgroups without high malaria burden (seropositivity 2% and 0% with and without high dengue burden, respectively) (Figure 2).

An inverse association was seen with HIV infection, with lower proportions of anti-SARS-CoV-2 antibody positivity in countries with high HIV transmission or datasets with  $>10\%$

of the sample being HIV-positive than in datasets with lower HIV rates (summary positivity 8% versus 15%). There was large between-dataset heterogeneity ( $p < 0.001$ ) within each group.

### **Other assessed associations with infectious disease indicators**

One study<sup>11</sup> provided data on positivity with 4 different anti-SARS-CoV-2 antibodies in subgroups defined by the presence of *Plasmodium* parasitemia. Combining the 4 evaluations (Supplementary Table 4), the summary odds ratio was 1.84 (95% CI, 0.90-3.78,  $I^2=29.2\%$ ). Two studies<sup>9,12</sup> included data from 3 cohorts where presence of anti-SARS-CoV-2 antibodies was given per HIV serostatus (Supplementary Table 5); the summary odds ratio was 0.97 (0.55-1.70,  $I^2=0\%$ ). Data were limited or not presented in sufficient detail for formal meta-analysis for other infectious disease indicators.

## **DISCUSSION**

The present meta-analysis includes data from 22 studies with 117 datasets and more than 20,000 measurements of anti-SARS-CoV-2 antibodies in pre-pandemic samples from Africa. On average, 1 of 7 samples tested positive for anti-SARS-CoV-2 antibodies, but there was extensive heterogeneity across studies and datasets, with several studies finding 0% positivity and some others exceeding 80%. Cross-reacting immunity was slightly more common with IgM rather than IgG measurements on average, but prominence of IgM versus IgG signals varied greatly across datasets. While spike and nucleocapsid antibodies overall did not have substantial differences in positivity on average, subtypes with spike had different profiles with higher positivity for antibodies to the S1 domain rather than for antibodies to the RBD domain. Stark differences were seen according to malaria burden. Anti-SARS-CoV-2 positivity was seen almost entirely in samples from areas with malaria transmission throughout and/or enriched in malaria cases. A more modest association was seen for dengue. However, malaria and dengue endemicity largely

overlap, and samples coming from high dengue but low malaria burden settings had negligible positivity. Finally, HIV was associated with modestly lower frequency of anti-SARS-CoV-2 antibodies. This may have reflected mostly, if not entirely, the inverse geographical localization of HIV and malaria burden in Africa.

The composite picture is consistent with the possibility that the observed pre-pandemic humoral immunity to SARS-CoV-2 in Africa may reflect mostly cross-reactive response to malaria. Lapidus et al. suggest that this immune response is more common and more intense in acute and recent malaria.<sup>14</sup> The large between-dataset heterogeneity in positivity among studies with high malaria burden may reflect the large variability in the magnitude of that burden, with some datasets including exclusively acute malaria, others being heavily enriched in malaria cases, and others simply coming from areas with substantial malaria burden. Cross-reactivity with dengue is also possible, but most areas in Africa that have high dengue burden have also high malaria burden. Analysis of datasets from settings with high dengue but low malaria shows negligible anti-SARS-CoV-2 positivity. An elusive, previously unidentified coronavirus that circulated in parts of Africa in the past cannot be excluded, but it is unnecessary to invoke to explain the observed cross-reactive immunity. If it existed, such a pathogen may have largely shared the geography of malaria.

Anti-SARS-CoV-2 humoral immunity in pre-pandemic samples has generally not been observed in European and USA studies. Data from countries outside Africa also suggest that malaria rather than dengue has a strong association with the presence of antibodies that are cross-reactive against SARS-CoV-2. Manning et al.<sup>32</sup> found 14% cross-reactive positivity among 528 samples of patients with malaria from Cambodia. Data for dengue are mixed. One study in Taiwan<sup>33</sup> found higher optical density anti-S1 RBD activity in archival dengue samples than in

controls, but the optical density values were still low. Another study<sup>34</sup> found some IgM and IgA rather IgG false-positivity for SARS-CoV-2 in febrile illness from dengue in Thailand, but the false-positivity tended to be even more frequent for febrile illness from non-dengue cases (including apparently malaria). In a study with samples from Puerto Rico and USA,<sup>35</sup> dengue did not induce cross-reactive antibodies to SARS-CoV-2 and the same was true in dengue samples from Indonesia,<sup>36</sup> Colombia<sup>37</sup> and travel clinics.<sup>38</sup> Conversely, 5 of 17 archival dengue samples from India<sup>39</sup> had cross-reactive antibodies to SARS-CoV-2 and another study<sup>40</sup> found 22% cross-reactivity in samples from an Israel center (unspecified country of provenance); however, it is unknown whether any positive samples could be from patients who also had a history of malaria. SARS-CoV-2 infection has been described to frequently produce cross-reactive antibody activity to dengue,<sup>36,37,40</sup> but not seen in all studies.<sup>35</sup> Anti-SARS-CoV-2 antibodies may also have a protective role for dengue<sup>33</sup> and, interestingly, reported dengue cases and deaths have declined in 2020-2022 after a peak in 2019.<sup>41</sup> In-silico analysis shows possible similarities between SARS-CoV-2 epitopes in the HR2 domain of the spike protein and the dengue envelope protein,<sup>40</sup> but the evidence is again stronger for malaria, where cross-reactive antibodies specifically recognized the sialic acid moiety on N-linked glycans of the Spike protein.<sup>14</sup>

The clinical and public health importance of pre-existing humoral immunity remains a tantalizing question. Typically, the detected antibodies test negative in neutralization assays.<sup>13,14</sup> However, they may be a marker of a much broader immune response that includes both humoral and cellular features. Pre-existing T-cell immunity and its potential role in ameliorating clinical course in SARS-CoV-2 infection is another hotly debated issue.<sup>42</sup> It would be useful to assess pre-pandemic samples with anti-SARS-CoV-2 antibodies for a broad spectrum of immune

functionalities. Non-humoral immunity elements may be even more frequent than the detected humoral immunity, since humoral immunity tends to wane relatively rapidly with time.<sup>43</sup>

The geographical pattern of the documented impact of COVID-19 in Africa is intriguingly well aligned with the geographical pattern of detected pre-pandemic immunity. Recorded COVID-19 deaths have been far higher in South Africa (high HIV, relatively low malaria burden) and in northern African countries (low malaria burden) than in other countries in sub-Saharan Africa (high malaria burden). Differences in the extent of under-ascertainment of COVID-19 deaths, demographic and lifestyle differences (older populations in northern Africa, high levels of obesity in South Africa), and many other factors may explain in part or in whole these differences. However, a contribution of pre-existing immunity remains also an additional possibility. Pre-existing immunity has also been raised as a possible important contributing factor to low fatalities in East Asia,<sup>44</sup> and many areas in East Asia also have substantial malaria burden. Conversely, recent dengue outbreaks did not seem to protect from COVID-19 fatalities; the highest number of dengue cases and deaths in 2019 was seen in Brazil,<sup>41</sup> a country that suffered high COVID-19 fatalities.

Some limitations of our work should be discussed. First, the examined studies mostly used convenient samples available from pre-pandemic efforts not tailored specifically to answer questions posed by the pandemic. For many samples, information about their provenance and features was limited. Second, several of our analyses have ecological designs, e.g. when countries were assigned to high or low burden groups for specific pathogens. The observed associations may not necessarily hold true also at the level of analyses profiling prior infection in single individual samples. Nevertheless, the more limited individual level data available also agree with the main findings regarding malaria and HIV. Third, some analyses include datasets



which represent the same samples tested with different assays, therefore they are not entirely independent. However, the major differences observed (e.g. with malaria) remain strong even if only one dataset is selected per study/cohort (not shown). Fourth, it is uncertain whether publication biases may exist for the research questions addressed, e.g. if more studies that found no seropositivity in pre-pandemic African samples may have remained unpublished compared with studies that found high positivity. Fifth, the assays used were very diverse and the technical competence of their performance by different teams cannot be validated independently. This may explain also part of the observed large between-dataset heterogeneity. However, errors would tend to weaken observed associations, if anything, through non-differential mis-classification.

Acknowledging these caveats, our meta-analysis provides strong evidence for pre-pandemic humoral immunity to SARS-CoV-2 in Africa, closing tracking with malaria. Further studies of broader immunological profiles involved and of the public health implications are necessary.

## **Contributors**

Both authors conceived the original idea, wrote the protocol, extracted data, run and interpreted analyses, wrote and revised the paper and approved the final version.

## **Declaration of interests**

No conflicts of interest.

## **Data sharing statement**

All data are in the manuscript and its supplements

## REFERENCES

1. Adams J, MacKenzie MJ, Amegah AK, et al. The conundrum of low COVID-19 mortality burden in sub-Saharan Africa: myth or reality?. *Glob Health Sci Pract.* 2021;9(3):433-443.
2. Ioannidis JPA. Over- and under-estimation of COVID-19 deaths. *Eur J Epidemiol.* 2021 Jun;36(6):581-588.
3. Pedersen J, Koumakpayi IH, Babuadze G, et al. Cross-reactive immunity against SARS-CoV-2 N protein in Central and West Africa precedes the COVID-19 pandemic. *Sci Rep.* 2022 Jul 28;12(1):12962.
4. Traoré A, Guindo MA, Konaté D, et al. Seroreactivity of the Severe Acute Respiratory Syndrome Coronavirus 2 Recombinant S Protein, Receptor-Binding Domain, and Its Receptor-Binding Motif in COVID-19 Patients and Their Cross-Reactivity With Pre-COVID-19 Samples From Malaria-Endemic Areas. *Front Immunol.* 2022 Apr 27;13:856033.
5. Iriemenam NC, Ige FA, Greby SM, et al. Validation of xMAP SARS-CoV-2 Multi-Antigen IgG assay in Nigeria. *PLoS One.* 2022 Apr 1;17(4):e0266184.
6. Borrega R, Nelson DKS, Koval AP, et al. Cross-Reactive Antibodies to SARS-CoV-2 and MERS-CoV in Pre-COVID-19 Blood Samples from Sierra Leoneans. *Viruses.* 2021 Nov 21;13(11):2325.
7. Ige F, Hamada Y, Steinhardt L, et al. Validation of Commercial SARS-CoV-2 Immunoassays in a Nigerian Population. *Microbiol Spectr.* 2021 Oct 31;9(2):e0068021.

8. Woodford J, Sagara I, Dicko A, et al. Severe Acute Respiratory Syndrome Coronavirus 2 Seroassay Performance and Optimization in a Population With High Background Reactivity in Mali. *J Infect Dis.* 2021 Dec 15;224(12):2001-2009.
9. Baker OR, Grabowski MK, Galiwango RM, et al. Differential Performance of CoronaCHEK SARS-CoV-2 Lateral Flow Antibody Assay by Geographic Origin of Samples. *J Clin Microbiol.* 2021 Jun 18;59(7):e0083721.
10. Steinhardt LC, Ige F, Iriemenam NC, et al. Cross-Reactivity of Two SARS-CoV-2 Serological Assays in a Setting Where Malaria Is Endemic. *J Clin Microbiol.* 2021 Jun 18;59(7):e0051421.
11. Emmerich P, Murawski C, Ehmen C, et al. Limited specificity of commercially available SARS-CoV-2 IgG ELISAs in serum samples of African origin. *Trop Med Int Health.* 2021 Jun;26(6):621-631.
12. Tso FY, Lidenge SJ, Peña PB, et al. High prevalence of pre-existing serological cross-reactivity against severe acute respiratory syndrome coronavirus-2 (SARS-CoV-2) in sub-Saharan Africa. *Int J Infect Dis.* 2021 Jan;102:577-583.
13. Yansouni CP, Papenburg J, Cheng MP, et al. Specificity of SARS-CoV-2 Antibody Detection Assays against S and N Proteins among Pre-COVID-19 Sera from Patients with Protozoan and Helminth Parasitic Infections. *J Clin Microbiol.* 2022 Jan 19;60(1):e0171721.
14. Lapidus S, Liu F, Casanovas-Massana A, et al.. Plasmodium infection induces cross-reactive antibodies to carbohydrate epitopes on the SARS-CoV-2 Spike protein. medRxiv [Preprint]. 2021 May 12:2021.05.10.21256855.

15. Munn Z, Moola S, Riitano D, Lisy K. The development of a critical appraisal tool for use in systematic reviews addressing questions of prevalence. *Int J Heal Policy Manag.* 2014;3(3):123–8.
16. Lau J, Ioannidis JP, Schmid CH. Quantitative synthesis in systematic reviews. *Ann Intern Med.* 1997 Nov 1;127(9):820-6.
17. Ioannidis JP. Interpretation of tests of heterogeneity and bias in meta-analysis. *J Eval Clin Pract.* 2008 Oct;14(5):951-7.
18. CDC. Malaria distribution, in: <https://www.cdc.gov/malaria/about/distribution.html>, last accessed September 13, 2022.
19. Dengue Global Consensus 2013 map, in <https://www.healthmap.org/dengue/en/>, last accessed September 13, 2022.
20. AIDS adult prevalence, in [https://en.wikipedia.org/wiki/List\\_of\\_countries\\_by\\_HIV/AIDS\\_adult\\_prevalence\\_rate](https://en.wikipedia.org/wiki/List_of_countries_by_HIV/AIDS_adult_prevalence_rate), last accessed September 13, 2022.
21. Benjamin DJ, Berger JO, Johannesson M, et al. Redefine statistical significance. *Nat Hum Behav.* 2018 Jan;2(1):6-10.
22. Yadouleton A, Sander AL, Moreira-Soto A, et al. Limited Specificity of Serologic Tests for SARS-CoV-2 Antibody Detection, Benin. *Emerg Infect Dis.* 2021 Jan;27(1):233–7.
23. Diagne CT, Ndiaye O, Talla C, et al. Cross-Reactivity of SARS-CoV-2 Laboratory Diagnostics to Endemic Diseases in Africa: A Diagnostic Accuracy Study. Available at SSRN: <http://dx.doi.org/10.2139/ssrn.3916756>

24. Mveang Nzoghe A, Essone PN, Leboueny M, et al. Evidence and implications of pre-existing humoral cross-reactive immunity to SARS-CoV-2. *Immun Inflamm Dis*. 2021 Mar;9(1):128-133.
25. Souris M, Tshilolo L, Parzy D, Lobaloba Ingoba L, Ntoumi F, Kamgaing R. Pre-Pandemic SARS-CoV-2 Potential Natural Immunity Among Population of Central Africa. *Research Square* 2021, DOI: <https://doi.org/10.21203/rs.3.rs-588697/v1>
26. Lobaloba Ingoba L, Djontu JC, Mfoutou Mapanguy CC, et al. Seroprevalence of anti-SARS-CoV-2 antibodies in a population living in Bomassa village, Republic of Congo. *IJID Reg*. 2022 Mar;2:130-136.
27. Gdoura M, Ghaloum FB, Hamida MB, Chamsa W, Triki H, Bahloul C. Development of an in-house quantitative ELISA for the evaluation of different Covid-19 vaccines in humans. *Sci Rep*. 2022 Jul 4;12(1):11298. doi: 10.1038/s41598-022-15378-1.
28. Gebrecherkos T, Kiros YK, Challa F, et al. Longitudinal profile of antibody response to SARS-CoV-2 in patients with COVID-19 in a setting from Sub-Saharan Africa: A prospective longitudinal study. *PLoS One*. 2022 Mar 23;17(3):e0263627.
29. Gelanew T, Seyoum B, Mulu A, et al. High seroprevalence of anti-SARS-CoV-2 antibodies among Ethiopian healthcare workers. *BMC Infect Dis*. 2022 Mar 16;22(1):261.
30. Mboumba Bouassa RS, Péré H, Tonen-Wolyec S, et al. Unexpected high frequency of unspecific reactivities by testing pre-epidemic blood specimens from Europe and Africa with SARS-CoV-2 IgG-IgM antibody rapid tests points to IgM as the Achilles heel. *J Med Virol*. 2021 Apr;93(4):2196-2203.

31. Vanroye F, Bossche DVD, Brosius I, Tack B, Esbroeck MV, Jacobs J. COVID-19 Antibody Detecting Rapid Diagnostic Tests Show High Cross-Reactivity When Challenged with Pre-Pandemic Malaria, Schistosomiasis and Dengue Samples. *Diagnostics (Basel)*. 2021 Jun 25;11(7):1163.
32. Manning J, Zaidi I, Lon C, et al. SARS-CoV-2 cross-reactivity in prepandemic serum from rural malaria-infected persons, Cambodia. *Emerg Infect Dis*. 2022;28:440–4.
33. Cheng YL, Chao CH, Lai YC, et al. Antibodies against the SARS-CoV-2 S1-RBD cross-react with dengue virus and hinder dengue pathogenesis. *Front Immunol*. 2022 Aug 15;13:941923.
34. Luvira V, Leaungwutiwong P, Thippornchai N, et al. False Positivity of Anti-SARS-CoV-2 Antibodies in Patients with Acute Tropical Diseases in Thailand. *Trop Med Infect Dis*. 2022 Jul 12;7(7):132.
35. Munoz-Jordan J, Cardona J, Beltrán M, et al. Evaluation of Serologic Cross-Reactivity Between Dengue Virus and SARS-CoV-2 in Patients with Acute Febrile Illness - United States and Puerto Rico, April 2020-March 2021. *MMWR Morb Mortal Wkly Rep*. 2022 Mar 11;71(10):375-377.
36. Santoso MS, Masyeni S, Haryanto S, et al. Assessment of dengue and COVID-19 antibody rapid diagnostic tests cross-reactivity in Indonesia. *Virology*. 2021 Mar 11;18(1):54. doi: 10.1186/s12985-021-01522-2.
37. Faccini-Martínez AA, Rivero R, Garay E, et al. Serological cross-reactivity using a SARS-CoV-2 ELISA test in acute Zika virus infection, Colombia. *Int J Infect Dis*. 2020 Dec;101:191-193. doi: 10.1016/j.ijid.2020.09.1451. Epub

38. Spinicci M, Bartoloni A, Mantella A, Zammarchi L, Rossolini GM, Antonelli A. Low risk of serological cross-reactivity between dengue and COVID-19. *Mem Inst Oswaldo Cruz*. 2020;115:e200225.
39. Nath H, Mallick A, Roy S, et al. Archived dengue serum samples produced false-positive results in SARS-CoV-2 lateral flow-based rapid antibody tests. *J Med Microbiol*. 2021 Jun;70(6):001369. doi: 10.1099/jmm.0.001369.
40. Lustig Y, Keler S, Kolodny R, et al. Potential Antigenic Cross-reactivity Between Severe Acute Respiratory Syndrome Coronavirus 2 (SARS-CoV-2) and Dengue Viruses. *Clin Infect Dis*. 2021 Oct 5;73(7):e2444-e2449. doi: 10.1093/cid/ciaa1207.
41. WHO. Dengue and severe dengue, update Jan 10, 2022.
42. Le Bert N, Tan AT, Kunasegaran K, et al. SARS-CoV-2-specific T cell immunity in cases of COVID-19 and SARS, and uninfected controls. *Nature*. 2020 Aug;584(7821):457-462.
43. Goldberg Y, Mandel M, Bar-On YM, et al. Protection and Waning of Natural and Hybrid Immunity to SARS-CoV-2. *N Engl J Med*. 2022 Jun 9;386(23):2201-2212.
44. Bhattacharya J, Magness P, Kulldorff M. Understanding the exceptional pre-vaccination era East Asian COVID-19 outcomes. *Adv Biol Regul* 2022





**Figure 1: Flow chart for searches and eligible studies**

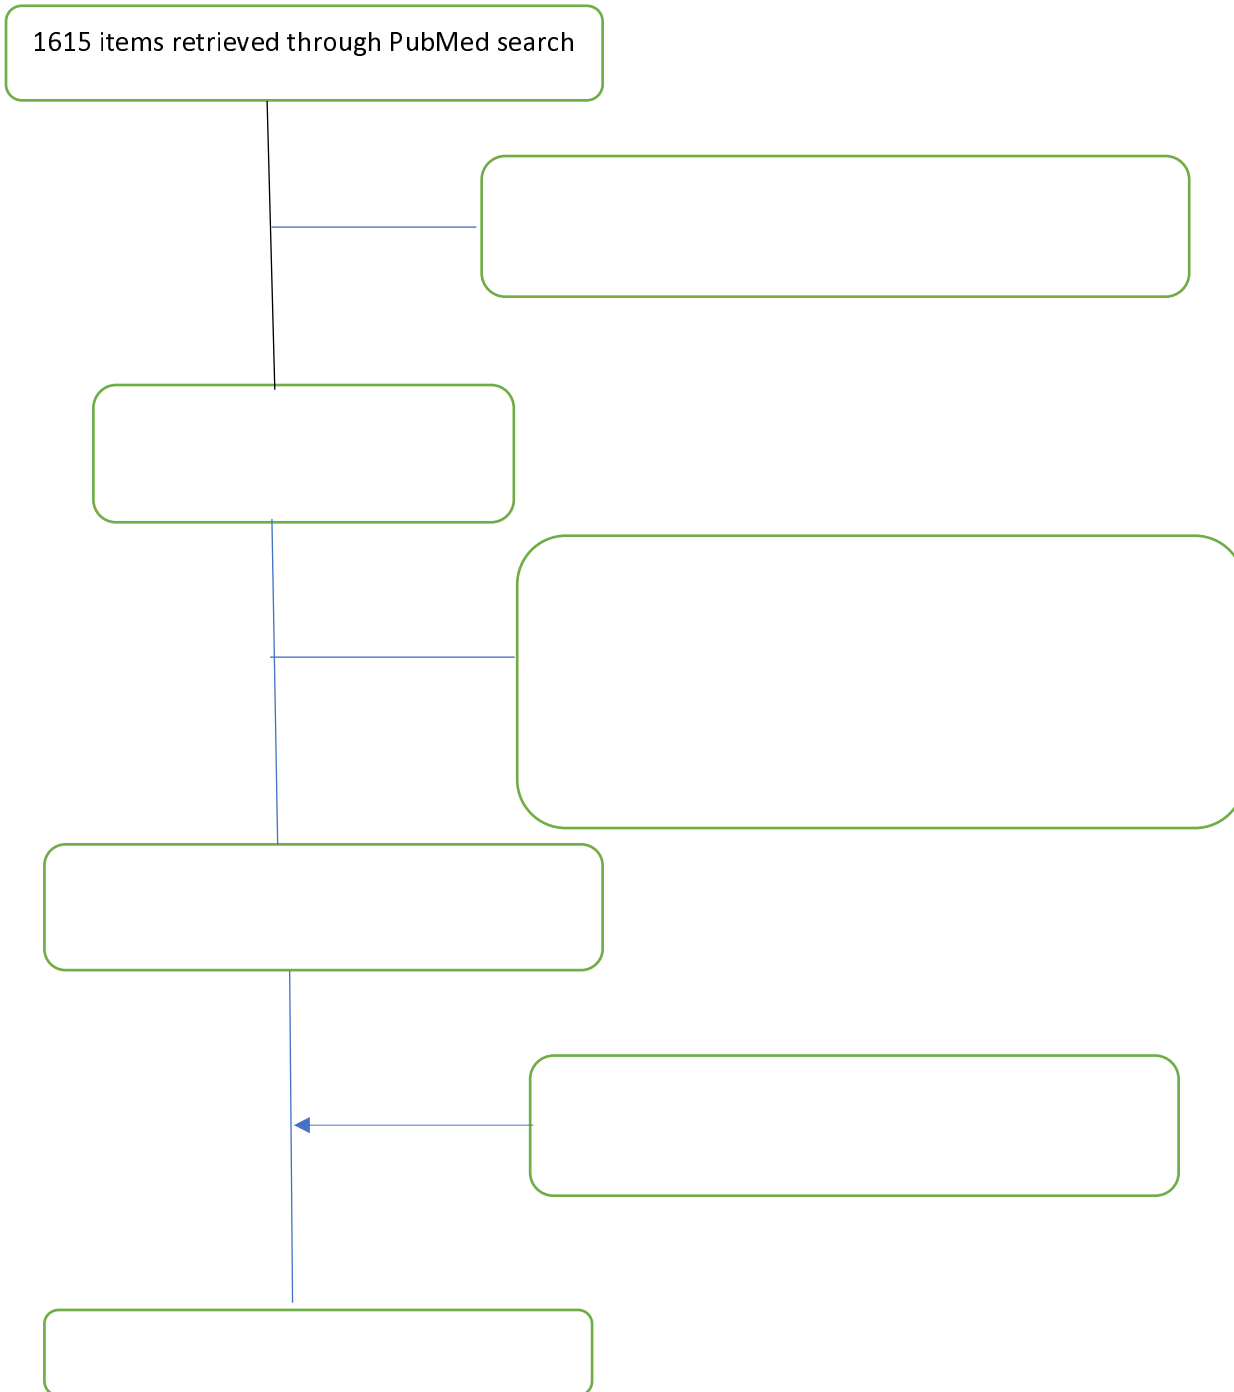

**Figure 2: Meta-analysis of positivity rates for anti-SARS-COV-2 antibodies in pre-pandemic samples for studies from countries or settings with high malaria burden only, high malaria and high dengue burden, low malaria and high dengue burden, and neither malaria nor dengue high burden.**

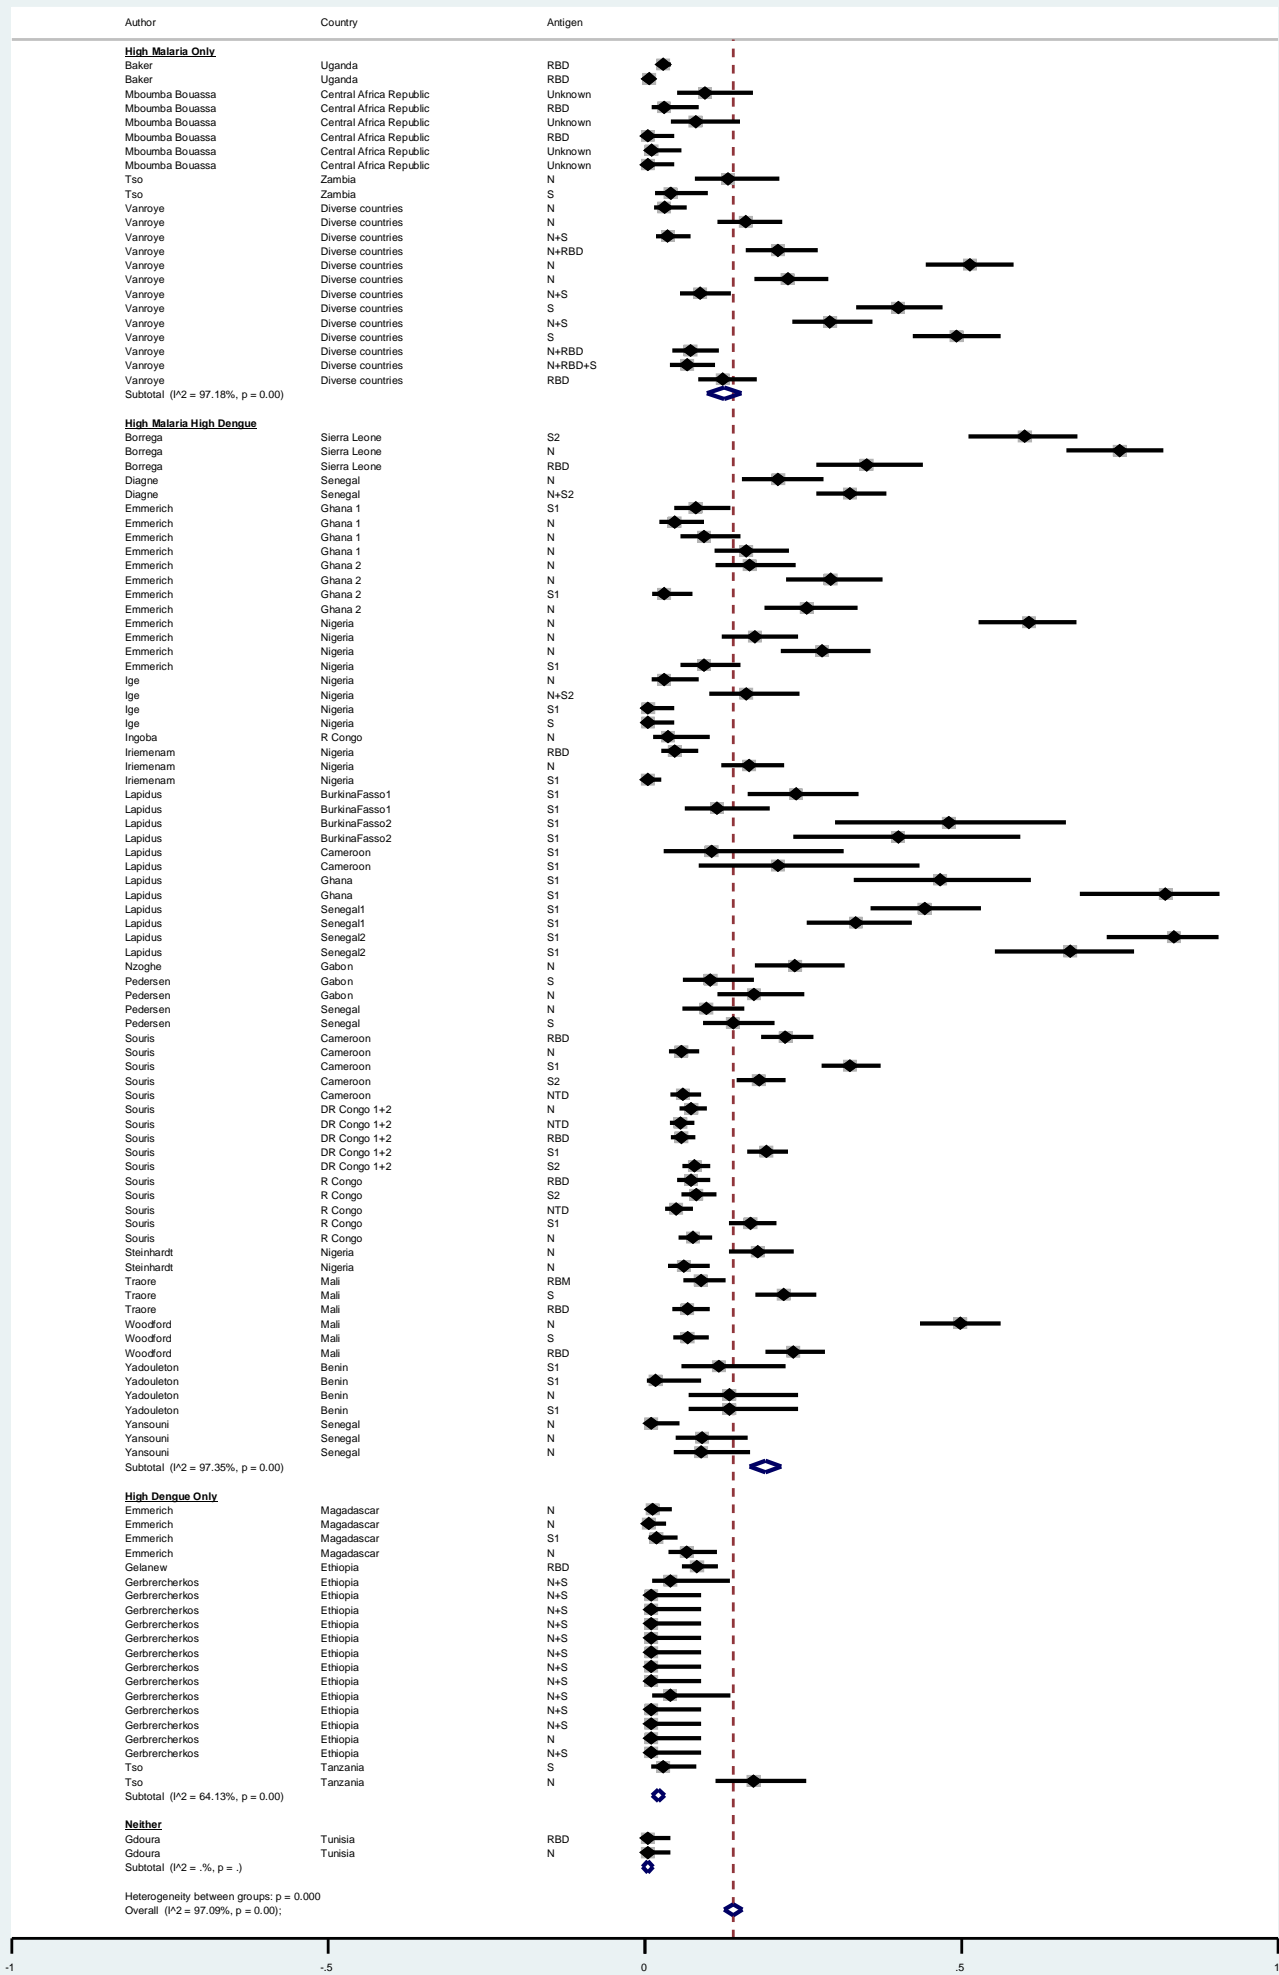

**Table 1. Characteristics of eligible studies**

| <b>Author</b> | <b>Country</b> | <b>Sample size</b> | <b>Provenance of the samples and sampling process</b>            | <b>Time period of sample collection</b> | <b>Age in years (median)</b> |
|---------------|----------------|--------------------|------------------------------------------------------------------|-----------------------------------------|------------------------------|
| Pedersen      | Gabon          | 146                | Unclear                                                          | Oct 2019                                | 18-50                        |
|               | Senegal        | 150                | Unclear                                                          | Jan 2017-<br>May 2018                   | 65% <18                      |
| Borrega       | Sierra Leone   | 120                | Lassa and Ebola survivors and their contacts                     | Sept 2016-<br>April 2019                | 8-60 (31)                    |
| Tso           | Tanzania       | 105                | Blood donors, 6.7% HIV-positive                                  | Mar 2019-<br>May 2019                   | ≥18                          |
|               | Zambia         | 99                 | Enriched in HIV-positive (43.4%)                                 | 2017- early<br>2019                     | ≥18                          |
| Emmerich      | Magadascar     | 167                | Pregnant women                                                   | 2010                                    | 20-30 (23)                   |
|               | Ghana          | 150                | Children                                                         | 2014-2015                               | 3-7 (6)                      |
|               | Ghana          | 133                | Teens and adults                                                 | 1999                                    | 16-45 (22)                   |
|               | Nigeria        | 150                | Adults                                                           | 2018                                    | 30-58 (41)                   |
| Yadouleton    | Benin          | 60                 | Acute febrile illness, tested for hemorrhagic fever surveillance | Oct 2019 –<br>Nov 2019                  | 12-65 (28)                   |
| Nzoghe        | Gabon          | 135                | Healthy healthcare worker volunteers                             | 2014                                    | 14-80 (38)                   |
| Woodford      | Mali           | 312                | Urban healthy adults                                             | Jan 2017                                | ≥18                          |
|               |                |                    | Rural healthy adults                                             | May 2019                                | ≥18                          |

|        |          |      |                                                                                                         |                     |            |
|--------|----------|------|---------------------------------------------------------------------------------------------------------|---------------------|------------|
|        |          |      | Rural women of childbearing age                                                                         | May 2019            | ≥18        |
|        |          |      | Rural all ages                                                                                          | May 2018            | All ages   |
| Baker  | Uganda   | 1077 | Rakai Community Cohort Study (543 febrile within one month, 534 non-febrile matched for age and gender) | 2011-2013           | 18-54 (30) |
| Souris | DR Congo | 190  | Healthy subjects (hospital staff and volunteers) and young sickle-cell disease patients                 | 2019                | Any age    |
|        | DR Congo | 383  | Biobank from Plasmodium study in Kinshasa                                                               | 2014 – 2015         | Any age    |
|        | Cameroon | 383  | Continual health monitoring project for HIV patients                                                    | Jun 2018 – Jun 2019 | Any age    |
|        | R Congo  | 384  | Research samples from two districts                                                                     | 2016, 2019          | Any age    |
| Ige    | Nigeria  | 100  | 50 HBV-positive (S-antigen) and 50 HIV-positive                                                         | Before Oct 2019     | (35)       |
| Traore | Mali     | 283  | Malaria survey in Dangassa village                                                                      | 2019                | Unclear    |
| Ingoba | R Congo  | 82   | Bomassa village                                                                                         | Jun- Jul 2019       | Unclear    |
| Diagne | Senegal  | 272  | Biobank                                                                                                 | Before Sept 2019    | Unclear    |

|                    |                                |      |                                                                                                                                  |                       |                |
|--------------------|--------------------------------|------|----------------------------------------------------------------------------------------------------------------------------------|-----------------------|----------------|
| Yansouni           | Senegal                        | 100  | Clinical suspects for malaria                                                                                                    | Before Jul<br>2019    | Unclear        |
| Iriemenam          | Nigeria                        | 213  | Nigeria HIV/AIDS Indicator<br>and Impact Survey                                                                                  | 2018                  | 0-60 (15)      |
| Steinhardt         | Nigeria                        | 213  | Nigeria HIV/AIDS Indicator<br>and Impact Survey                                                                                  | 2018                  | 0-60 (15)      |
| Gelanew            | Ethiopia                       | 365  | Pre-pandemic sera                                                                                                                | 2012-2018             | Unclear        |
| Gebrecherkos       | Ethiopia                       | 50   | Pre-pandemic samples from<br>patients with other infections                                                                      | 2017                  | Unclear        |
| Mboumba<br>Bouassa | Central<br>African<br>Republic | 100  | National center of sexually<br>transmitted diseases in<br>Bnngui, 54 HIV-<br>seropositive, 5 HCV-<br>positive, 35 HBsAg-positive | 2000-2011             | (31 mean)      |
| Gdoura             | Tunisia                        | 116  | Pre-pandemic samples                                                                                                             | 2017                  | Unclear        |
| Vanroye            | Diverse<br>African             | 195* | Travelers from Africa with<br>malaria or schistosomiasis                                                                         | 2010-2018             | 8-61 (~40)     |
| Lapidus            | Cameroon                       | 19   | Malaria patients                                                                                                                 | Jul-Nov 2018          | 2-64 (26 mean) |
|                    | Senegal 1                      | 120  | Malaria patients                                                                                                                 | Jul 2019              | 1-74 (22 mean) |
|                    | Senegal 2                      | 67   | Malaria patients                                                                                                                 | 2015-2017             | 5-16 (11 mean) |
|                    | Burkina<br>Fasso 1             | 88   | Malaria patients                                                                                                                 | Jul-Aug 2017          | 0-4 (3 mean)   |
|                    | Burkina<br>Fasso 2             | 25   | Malaria patients                                                                                                                 | Oct 2016-<br>Feb 2017 | 21-43 (33)     |

|  |       |    |                  |                        |           |
|--|-------|----|------------------|------------------------|-----------|
|  | Ghana | 45 | Malaria patients | Jul 2007-<br>June 2010 | 3-70 (15) |
|--|-------|----|------------------|------------------------|-----------|

\*Includes 9 samples from Asia and 19 of unknown country origin; besides the n=195, the study has 25 patients with dengue, but few are from Africa, so only the malaria and schistosomiasis cases are considered here

**Table 2. Immunological assays performed in the eligible studies and other pathogen indicators assessed**

| <b>Author</b> | <b>Antibody assays used</b>                        | <b>Antigenic targets</b>                                                  | <b>Other pathogen indicators assessed</b>                                                           |
|---------------|----------------------------------------------------|---------------------------------------------------------------------------|-----------------------------------------------------------------------------------------------------|
| Pedersen      | ELISA                                              | S, N                                                                      |                                                                                                     |
| Borrega       | reSARS, cutoffs defined by USA samples             | N, RBD, S2                                                                |                                                                                                     |
| Tso           | Immunofluorescence assay, with USA control samples | N, S                                                                      | HIV                                                                                                 |
| Emmerich      | Euroimmun, EDI, Mikrogen recomWell                 | S1 IgG (Euroimmun), N IgG (Euroimmun), N IgG (EDI), N IgG (Mikrogen)      | <i>Plasmodium</i> parasitemia                                                                       |
| Yadouleton    | Euroimmun, INBIOS                                  | S IgG (Euroimmun), S1 IgA (Euroimmun), S1 IgG (INBIOS), N IgG (Euroimmun) |                                                                                                     |
| Nzoghe        | Elecsys Roche                                      | N all subclasses                                                          | Multiple infectious indicators assessed but presented only for SARS-COV-2 antibody-positive samples |
| Woodford      | Previously developed at NIH with USA samples       | S, N, RBD                                                                 | <i>Plasmodium</i> antigens                                                                          |
| Baker         | CoronaCHEK                                         | Spike RBD IgG or IgM                                                      | HIV                                                                                                 |
| Souris        | INNOBIOCHIPS ELISA,                                | S1, S2, S1-RBD, S1-                                                       |                                                                                                     |



|              |                                               |                                                                              |                                                                                                                                              |
|--------------|-----------------------------------------------|------------------------------------------------------------------------------|----------------------------------------------------------------------------------------------------------------------------------------------|
|              | calibrated on other human coronaviruses       | NTD, N                                                                       |                                                                                                                                              |
| Ige          | Euroimmun, Mologic, Abbott Architect          | S1 IgG (Euroimmun), N IgG (Euroimmun), S2 or N IgG (Mologic), N IgG (Abbott) |                                                                                                                                              |
| Traore       | ELISA                                         | S IgG, RBD IgG, RBM IgG                                                      | <i>Plasmodium</i> parasitemia, <i>Plasmodium</i> smear                                                                                       |
| Ingoba       | Virotech, according to kit manufacturer       | N IgG (also IgM but no data given)                                           |                                                                                                                                              |
| Diagne       | Omega, ID-screen                              | N or S2 IgG (Omega), N IgG (ID-screen)                                       | <i>Plasmodium</i> and other pathogen antibodies                                                                                              |
| Yansouni     | Abbott Architect, Rapid diagnostic test (RDT) | N IgG (Abbott), N IgM (RDT), N IgG (RDT)                                     |                                                                                                                                              |
| Iriemenam    | x-MAP multisntigen                            | N IgG, RBD IgG, S1 IgG                                                       |                                                                                                                                              |
| Steinhardt   | Euroimmun, Abbott Architect                   | N IgG (Euroimmun), N IgG (Abbott)                                            | <i>Plasmodium</i> antibodies, <i>Plasmodium</i> antigens, antibodies for filariasis, oncocherciasis, syphilis/yaws, cystocercosis, taeniasis |
| Gelanew      | ELISA                                         | RBD IgG                                                                      |                                                                                                                                              |
| Gebrecherkos | Canea, Cellex, VivaChek,                      | N+S IgG or IgM (Cenea,                                                       |                                                                                                                                              |

|                    |                                 |                                                                                                                                                                                                                                             |                                              |
|--------------------|---------------------------------|---------------------------------------------------------------------------------------------------------------------------------------------------------------------------------------------------------------------------------------------|----------------------------------------------|
|                    | Innovita; ECLIA Roche           | Cellex, VivaChek, Innovite), N all immunoglobulin (Roche)                                                                                                                                                                                   |                                              |
| Mboumba<br>Bouassa | BIOSYNEX, SIENNA, NG-test       | RBD IgG and RBD IgM (BIOSYNEX), unknown antigen IgG and unknown antigen IgM (SIENNA), unknown antigen IgG and unknown antigen IgM (NG-test)                                                                                                 |                                              |
| Gdoura             | Vidas Biomerieux, Elecsys Roche | RBD IgG (Vidas), N all subclasses (Elecsys)                                                                                                                                                                                                 |                                              |
| Vanroye            | 13 RDTs                         | N IgG or IgM (Toda, Biohit, Panbio, Boson), N+S IgG or IgM (Cellex, Dynamiker, Liming Bio), RBD IgG or IgM (ZenTech), N+RBD IgG or IgM (SureScreen Diagnostics, Singuway), N+RBD+S IgG or IgM (Multi-G), S IgG or IgM (Healgen), S (Wantai) |                                              |
| Lapidus            | ELISA                           | S1 IgG, S1 IgM                                                                                                                                                                                                                              | All participants have had malaria (different |

|  |  |  |                      |
|--|--|--|----------------------|
|  |  |  | clinical phenotypes) |
|--|--|--|----------------------|

**Table 3. Summary estimates of anti-SARS-CoV-2 antibody positivity in pre-pandemic African samples**

| <b>GROUPS</b>               | <b>Datasets</b> | <b>Positivity (95% CI), %</b> | <b>I<sup>2</sup></b> |
|-----------------------------|-----------------|-------------------------------|----------------------|
| <b>Antigenic target*</b>    |                 |                               |                      |
| Any N                       | 38              | 15 (12-16)                    | 96.8%                |
| Any S                       | 56              | 15 (13-17)                    | 97.4%                |
| S1                          | 24              | 21 (16-25)                    | 97.6%                |
| RBD                         | 15              | 9 (6-11)                      | 97.0%                |
| Any N +S                    | 20              | 6 (3-9)                       | 98.4%                |
| <b>Type of antibodies**</b> |                 |                               |                      |
| IgG                         | 82              | 13 (11-14)                    | 96.9%                |
| IgM                         | 15              | 13 (8-18)                     | 95.9%                |
| IgG/IgM                     | 16              | 14 (9-20)                     | 97.0%                |
| <b>Malaria burden***</b>    |                 |                               |                      |
| High                        | 95              | 17 (15-19)                    | 97,5%                |
| Low/None                    | 22              | 1 (0-2)                       | 69.2%                |
| <b>Dengue burden***</b>     |                 |                               |                      |
| High                        | 92              | 15 (13-17)                    | 97.0%                |
| Low/None                    | 25              | 11 (8-13)                     | 97.0%                |
| <b>HIV burden***</b>        |                 |                               |                      |
| High                        | 22              | 8 (6-10)                      | 95.8%                |
| Low/None                    | 82              | 15 (13-16)                    | 97.2%                |

\*“Any S” includes S (n=9), S1 (n=24), S2 (n=4), RBD (n=15), RBM (n=3), NTD (n=1); “N+S” includes N+S (n=15), N+RBD (n=2), N+RBD+S (n=1) and N+S2 (n=2); for n=4 the antigen was unknown

\*\*not shown are IgA (n=1 dataset) and all immunoglobulin subclasses (n=4 datasets)

\*\*\*see Methods for definitions of subgroups

### Supplementary Table 1: Joanna Briggs risk of bias assessment

|   | CRITERION                                                                          | Scoring of studies                                                                                                                                                                                          |
|---|------------------------------------------------------------------------------------|-------------------------------------------------------------------------------------------------------------------------------------------------------------------------------------------------------------|
| 1 | Was the sample representative of the target population?                            | Not applicable (no datasets had been collected with prior anticipation to be used for this pandemic-related question)                                                                                       |
| 2 | Were study participants recruited in an appropriate way?                           | Unclear in all studies                                                                                                                                                                                      |
| 3 | Was the sample size adequate?                                                      | Yes for Woodford, Baker, Souris, Gelanew and No for the other 18 studies (setting a threshold of having at least N=306 samples for 4% precision at 95% CI with expected proportion of positivity being 15%) |
| 4 | Were the study subjects and the setting described in detail?                       | No for Pedersen, Gelanew, and Gdoura and Yes for the other 15 studies if lenient about required information; most studies however did not give in-depth details                                             |
| 5 | Was the data analysis conducted with sufficient coverage of the identified sample? | Yes for all studies, given that samples could be measured for antibodies with no/few missing measurements (although one cannot be certain of missingness at earlier stages of sampling)                     |
| 6 | Were objective, standard criteria used for the measurement of the condition?       | Yes for all studies (based on providing definitions for positivity that are standard or defensible)                                                                                                         |
| 7 | Was the condition measured reliably?                                               | Unclear in all studies (it cannot be verified that antibody assays were performed reliably)                                                                                                                 |
| 8 | Was there appropriate statistical analysis?                                        | Yes for all studies (if one requires only provision of                                                                                                                                                      |

|    |                                                                                           |                                                                                                                                              |
|----|-------------------------------------------------------------------------------------------|----------------------------------------------------------------------------------------------------------------------------------------------|
|    |                                                                                           | positive and tested, not all studies gave confidence intervals, but these can be calculated in number of positives and of tested are given)) |
| 9  | Are all important confounding factors/subgroups/differences identified and accounted for? | No for all studies, although several did explore some factors (as delineated in Table 2)                                                     |
| 10 | Were subpopulations identified using objective criteria?                                  | Yes, for subpopulations listed in Table 2                                                                                                    |

**Supplementary Table 2. Data on positivity and covariates of interest extracted**

| Author     | Country      | Antigenic targets  | Antigen | Antibody | HIV high positivity | Malaria high burden | Dengue high burden | Positive | Tested     |
|------------|--------------|--------------------|---------|----------|---------------------|---------------------|--------------------|----------|------------|
| Pedersen   | Gabon        | S                  | S       | IgG      | No<10%              | Yes                 | Yes                | 12       | 116        |
| Pedersen   | Gabon        | N                  | N       | IgG      | No<10%              | Yes                 | Yes                | 20       | 116        |
| Pedersen   | Senegal      | S                  | S       | IgG      | No<10%              | Yes                 | Yes                | 20       | 144        |
| Pedersen   | Senegal      | N                  | N       | IgG      | No<10%              | Yes                 | Yes                | 14       | 144        |
| Forrega    | Sierra Leone | N                  | N       | IgG      | No<10%              | Yes                 | Yes                | 90       | 120        |
| Forrega    | Sierra Leone | RBD                | RBD     | IgG      | No<10%              | Yes                 | Yes                | 42       | 120        |
| Forrega    | Sierra Leone | S2                 | S2      | IgG      | No<10%              | Yes                 | Yes                | 72       | 120        |
| Fiso       | Tanzania     | N                  | N       | IgG      | No<10%              | No                  | Yes                | 18       | 105        |
| Fiso       | Tanzania     | S                  | S       | IgG      | No<10%              | No                  | Yes                | 3        | 105        |
| Fiso       | Zambia       | N                  | N       | IgG      | Yes>10%             | Yes                 | No                 | 13       | 99         |
| Fiso       | Zambia       | S                  | S       | IgG      | Yes>10%             | Yes                 | No                 | 4        | 99         |
| Emmerich   | Magagascar   | S1 Euroimmun       | S1      | IgG      | No<10%              | No                  | Yes                | 3        | 167 (0 b)  |
| Emmerich   | Magagascar   | Nmod Euroimmun     | N       | IgG      | No<10%              | No                  | Yes                | 2        | 167 (0 b)  |
| Emmerich   | Magagascar   | N EDI              | N       | IgG      | No<10%              | No                  | Yes                | 11       | 167 (10 b) |
| Emmerich   | Magagascar   | N Mikrogen         | N       | IgG      | No<10%              | No                  | Yes                | 1        | 167 (3 b)  |
| Emmerich   | Ghana 1      | S1 Euroimmun       | S1      | IgG      | No<10%              | Yes                 | Yes                | 12       | 150 (1 b)  |
| Emmerich   | Ghana 1      | Nmod Euroimmun     | N       | IgG      | No<10%              | Yes                 | Yes                | 14       | 150 (11 b) |
| Emmerich   | Ghana 1      | N EDI              | N       | IgG      | No<10%              | Yes                 | Yes                | 24       | 150 (17 b) |
| Emmerich   | Ghana 1      | N Mikrogen         | N       | IgG      | No<10%              | Yes                 | Yes                | 7        | 150 (7 b)  |
| Emmerich   | Ghana 2      | S1 Euroimmun       | S1      | IgG      | No<10%              | Yes                 | Yes                | 4        | 133 (3 b)  |
| Emmerich   | Ghana 2      | Nmod Euroimmun     | N       | IgG      | No<10%              | Yes                 | Yes                | 34       | 133 (21 b) |
| Emmerich   | Ghana 2      | N EDI              | N       | IgG      | No<10%              | Yes                 | Yes                | 39       | 133 (15 b) |
| Emmerich   | Ghana 2      | N Mikrogen         | N       | IgG      | No<10%              | Yes                 | Yes                | 22       | 133 (10 b) |
| Emmerich   | Nigeria      | S1 Euroimmun       | S1      | IgG      | No<10%              | Yes                 | Yes                | 14       | 150 (7 b)  |
| Emmerich   | Nigeria      | Nmod Euroimmun     | N       | IgG      | No<10%              | Yes                 | Yes                | 42       | 150 (18 b) |
| Emmerich   | Nigeria      | N EDI              | N       | IgG      | No<10%              | Yes                 | Yes                | 91       | 150 (19 b) |
| Emmerich   | Nigeria      | N Mikrogen         | N       | IgG      | No<10%              | Yes                 | Yes                | 26       | 150 (6 b)  |
| Yadouleton | Benin        | S1 (Euroimmun)     | S1      | IgG      | No<10%              | Yes                 | No                 | 8        | 60 (1b)    |
| Yadouleton | Benin        | S1 IgA (Euroimmun) | S1      | IgA      | No<10%              | Yes                 | No                 | 7        | 60         |
| Yadouleton | Benin        | S1 (InBios)        | S1      | IgG      | No<10%              | Yes                 | No                 | 1        | 60         |
| Yadouleton | Benin        | N (Euroimmun)      | N       | IgG      | No<10%              | Yes                 | No                 | 8        | 60 (1b)    |
| Nzoghe     | Gabon        | N all subclasses   | N       | All Ig   | No<10%              | Yes                 | Yes                | 32       | 135        |
| Woodford   | Mali         | S                  | S       | IgG      | No<10%              | Yes                 | Yes                | 21       | 312        |
| Woodford   | Mali         | N                  | N       | IgG      | No<10%              | Yes                 | Yes                | 116      | 233        |
| Woodford   | Mali         | RBD                | RBD     | IgG      | No<10%              | Yes                 | Yes                | 73       | 312        |



|            |              |                       |      |     |         |     |     |     |          |
|------------|--------------|-----------------------|------|-----|---------|-----|-----|-----|----------|
| Baker      | Uganda       | Spike RBD IgM         | RBD  | IgM | No<10%  | Yes | No  | 31  | 1077     |
| Baker      | Uganda       | Spike RBD IgG         | RBD  | IgG | No<10%  | Yes | No  | 7   | 1077     |
| Jouris     | DR Congo 1+2 | S1                    | S1   | IgG | No<10%  | Yes | Yes | 110 | 574      |
| Jouris     | DR Congo 1+2 | S2                    | S2   | IgG | No<10%  | Yes | Yes | 45  | 574      |
| Jouris     | DR Congo 1+2 | S1-RBD                | RBD  | IgG | No<10%  | Yes | Yes | 33  | 574      |
| Jouris     | DR Congo 1+2 | S1-NTD                | NTD  | IgG | No<10%  | Yes | Yes | 32  | 574      |
| Jouris     | DR Congo 1+2 | N                     | N    | IgG | No<10%  | Yes | Yes | 42  | 574      |
| Jouris     | Cameroon     | S1                    | S1   | IgG | Yes>10% | Yes | Yes | 124 | 383      |
| Jouris     | Cameroon     | S2                    | S2   | IgG | Yes>10% | Yes | Yes | 69  | 383      |
| Jouris     | Cameroon     | S1-RBD                | RBD  | IgG | Yes>10% | Yes | Yes | 85  | 383      |
| Jouris     | Cameroon     | S1-NTD                | NTD  | IgG | Yes>10% | Yes | Yes | 23  | 383      |
| Jouris     | Cameroon     | N                     | N    | IgG | Yes>10% | Yes | Yes | 22  | 383      |
| Jouris     | R Congo      | S1                    | S1   | IgG | No<10%  | Yes | Yes | 64  | 384      |
| Jouris     | R Congo      | S2                    | S2   | IgG | No<10%  | Yes | Yes | 31  | 384      |
| Jouris     | R Congo      | S1-RBD                | RBD  | IgG | No<10%  | Yes | Yes | 28  | 384      |
| Jouris     | R Congo      | S1-NTD                | NTD  | IgG | No<10%  | Yes | Yes | 19  | 384      |
| Jouris     | R Congo      | N                     | N    | IgG | No<10%  | Yes | Yes | 29  | 384      |
| ge         | Nigeria      | S1 Abbott             | S1   | IgG | Yes>10% | Yes | Yes | 0   | 100      |
| ge         | Nigeria      | N Eurommun            | N    | IgG | Yes>10% | Yes | Yes | 3   | 100      |
| ge         | Nigeria      | S Eurommun            | S    | IgG | Yes>10% | Yes | Yes | 0   | 100      |
| ge         | Nigeria      | N or S2 Mologic       | N+S2 | IgG | Yes>10% | Yes | Yes | 16  | 100      |
| Graore     | Mali         | S                     | S    | IgG | No<10%  | Yes | Yes | 62  | 283      |
| Graore     | Mali         | RBD                   | RBD  | IgG | No<10%  | Yes | Yes | 19  | 283      |
| Graore     | Mali         | RBM                   | RBM  | IgG | No<10%  | Yes | Yes | 25  | 283      |
| ngoba      | R Congo      | Virotech              | N    | IgG | No<10%  | Yes | Yes | 3   | 82       |
| Diagne     | Senegal      | N or S2               | N+S2 | IgG | No<10%  | Yes | Yes | 88  | 272      |
| Diagne     | Senegal      | N                     | N    | IgG | No<10%  | Yes | Yes | 32  | 152      |
| Yansouni   | Senegal      | N (Abbott Architect)  | N    | IgG | No<10%  | Yes | Yes | 8   | 90       |
| Yansouni   | Senegal      | N IgM (Standard Q-SD) | N    | IgM | No<10%  | Yes | Yes | 9   | 100      |
| Yansouni   | Senegal      | N IgG (Standard Q-SD) | N    | IgG | No<10%  | Yes | Yes | 1   | 100      |
| riemenam   | Nigeria      | N                     | N    | IgG | Yes>10% | Yes | Yes | 35  | 213      |
| riemenam   | Nigeria      | RBD                   | RBD  | IgG | Yes>10% | Yes | Yes | 10  | 213      |
| riemenam   | Nigeria      | S1                    | S1   | IgG | Yes>10% | Yes | Yes | 1   | 213      |
| steinhardt | Nigeria      | N (Euroimmun)         | N    | IgG | Yes>10% | Yes | Yes | 38  | 213 (7b) |
| steinhardt | Nigeria      | N (Abbott)            | N    | IgG | Yes>10% | Yes | Yes | 13  | 212      |
| Gelane     | Ethiopia     | RBD                   | RBD  | IgG | No<10%  | No  | Yes | 30  | 365      |

|                 |                         |                                 |         |         |         |     |     |    |     |
|-----------------|-------------------------|---------------------------------|---------|---------|---------|-----|-----|----|-----|
| Jebrecherkos    | Ethiopia                | LFIA-Canea, (N and S)           | N+S     | IgM     | No<10%  | No  | Yes | 0  | 50  |
| Jebrecherkos    | Ethiopia                | LFIA-Canea, (N and S)           | N+S     | IgG     | No<10%  | No  | Yes | 0  | 50  |
| Jebrecherkos    | Ethiopia                | LFIA-Canea, (N and S)           | N+S     | IgG/IgM | No<10%  | No  | Yes | 0  | 50  |
| Jebrecherkos    | Ethiopia                | LFIA Cellex (N and S)           | N+S     | IgM     | No<10%  | No  | Yes | 0  | 50  |
| Jebrecherkos    | Ethiopia                | LFIA Cellex (N and S)           | N+S     | IgG     | No<10%  | No  | Yes | 0  | 50  |
| Jebrecherkos    | Ethiopia                | LFIA Cellex (N and S) (N and S) | N+S     | IgG/IgM | No<10%  | No  | Yes | 0  | 50  |
| Jebrecherkos    | Ethiopia                | LFIA-VivaCheck (N and S)        | N+S     | IgM     | No<10%  | No  | Yes | 0  | 50  |
| Jebrecherkos    | Ethiopia                | LFIA-VivaCheck (N and S)        | N+S     | IgG     | No<10%  | No  | Yes | 0  | 50  |
| Jebrecherkos    | Ethiopia                | LFIA-VivaCheck (N and S)        | N+S     | IgG/IgM | No<10%  | No  | Yes | 0  | 50  |
| Jebrecherkos    | Ethiopia                | LFIA-Innovita (N and S)         | N+S     | IgM     | No<10%  | No  | Yes | 2  | 50  |
| Jebrecherkos    | Ethiopia                | LFIA-Innovita (N and S)         | N+S     | IgG     | No<10%  | No  | Yes | 0  | 50  |
| Jebrecherkos    | Ethiopia                | LFIA-Innovita (N and S)         | N+S     | IgG/IgM | No<10%  | No  | Yes | 2  | 50  |
| Jebrecherkos    | Ethiopia                | ECLIA Roche (N)                 | N       | All Ig  | No<10%  | No  | Yes | 0  | 50  |
| ∩boumba Bouassa | Central Africa Republic | BIOSYNEX IgG                    | RBD     | IgG     | Yes>10% | Yes | No  | 0  | 100 |
| ∩boumba Bouassa | Central Africa Republic | BIOSYNEX IgM                    | RBD     | IgM     | Yes>10% | Yes | No  | 3  | 100 |
| ∩boumba Bouassa | Central Africa Republic | SIENNA IgG                      | Unknown | IgG     | Yes>10% | Yes | No  | 0  | 100 |
| ∩boumba Bouassa | Central Africa Republic | SIENNA IgM                      | Unknown | IgM     | Yes>10% | Yes | No  | 8  | 100 |
| ∩boumba Bouassa | Central Africa Republic | NG-test IgG                     | Unknown | IgG     | Yes>10% | Yes | No  | 1  | 95  |
| ∩boumba Bouassa | Central Africa Republic | NG-test IgM                     | Unknown | IgM     | Yes>10% | Yes | No  | 9  | 95  |
| ∩anroye*        | Diverse countries       | Toda IgG/IgM (N)                | N       | IgG/IgM | Unknown | Yes | No  | 6  | 195 |
| ∩anroye*        | Diverse countries       | Cellex IgG/IgM (N+S)            | N+S     | IgG/IgM | Unknown | Yes | No  | 7  | 195 |
| ∩anroye*        | Diverse countries       | Mutli-G IgG/IgM                 | N+RBD   | IgG/IgM | Unknown | Yes | No  | 13 | 195 |

|          |                   |                                          |             |         |         |     |     |     |     |
|----------|-------------------|------------------------------------------|-------------|---------|---------|-----|-----|-----|-----|
| √anroye* | Diverse countries | (N+RBD+S)<br>Sure Screen IgG/IgM (N+RBD) | +S<br>N+RBD | IgG/IgM | Unknown | Yes | No  | 14  | 195 |
| √anroye* | Diverse countries | Strong Strep IgG/IgM (N+S)               | N+S         | IgG/IgM | Unknown | Yes | No  | 17  | 195 |
| √anroye* | Diverse countries | QuickZen IgG/IgM (RBD)                   | RBD         | IgG/IgM | Unknown | Yes | No  | 24  | 195 |
| √anroye* | Diverse countries | Biohit IgG/IgM (N)                       | N           | IgG/IgM | Unknown | Yes | No  | 31  | 195 |
| √anroye* | Diverse countries | Singuway IgG/IgM (N+RBD)                 | N+RBD       | IgG/IgM | Unknown | Yes | No  | 41  | 195 |
| √anroye* | Diverse countries | Panbio IgG/IgM (N)                       | N           | IgG/IgM | Unknown | Yes | No  | 44  | 195 |
| √anroye* | Diverse countries | Dynamiker IgG/IgM (N+S)                  | N+S         | IgG/IgM | Unknown | Yes | No  | 57  | 195 |
| √anroye* | Diverse countries | Healgen IgG/IgM (S)                      | S           | IgG/IgM | Unknown | Yes | No  | 96  | 195 |
| √anroye* | Diverse countries | Wanti (ND) (S)                           | S           | Unclear | Unknown | Yes | No  | 78  | 195 |
| √anroye* | Diverse countries | Boson IgG/IgM (N)                        | N           | IgG/IgM | Unknown | Yes | No  | 100 | 195 |
| apidus   | Cameroon          | S1                                       | S1          | IgG     | No<10%  | Yes | Yes | 4   | 19  |
| apidus   | Cameroon          | S1                                       | S1          | IgM     | No<10%  | Yes | Yes | 2   | 19  |
| apidus   | Senegal1          | S1                                       | S1          | IgG     | No<10%  | Yes | Yes | 53  | 120 |
| apidus   | Senegal1          | S1                                       | S1          | IgM     | No<10%  | Yes | Yes | 40  | 120 |
| apidus   | Senegal2          | S1                                       | S1          | IgG     | No<10%  | Yes | Yes | 45  | 67  |
| apidus   | Senegal2          | S1                                       | S1          | IgM     | No<10%  | Yes | Yes | 56  | 67  |
| apidus   | BurkinaFasso1     | S1                                       | S1          | IgG     | No<10%  | Yes | Yes | 21  | 88  |
| apidus   | BurkinaFasso1     | S1                                       | S1          | IgM     | No<10%  | Yes | Yes | 10  | 88  |
| apidus   | BurkinaFasso2     | S1                                       | S1          | IgG     | No<10%  | Yes | Yes | 10  | 25  |
| apidus   | BurkinaFasso2     | S1                                       | S1          | IgM     | No<10%  | Yes | Yes | 12  | 25  |
| apidus   | Ghana             | S1                                       | S1          | IgG     | No<10%  | Yes | Yes | 37  | 45  |
| apidus   | Ghana             | S1                                       | S1          | IgM     | No<10%  | Yes | Yes | 21  | 45  |
| ḡdoura   | Tunisia           | RBD                                      | RBD         | IgG     | No<10%  | No  | No  | 0   | 116 |
| ḡdoura   | Tunisia           | N                                        | N           | IgG     | No<10%  | No  | No  | 0   | 116 |

**Supplementary Table 3. Data on paired IgM and IgG measurements on the same samples with the same assay**

| AUTHOR          | COUNTRY           | IgM only | IgG only | Both | None |
|-----------------|-------------------|----------|----------|------|------|
| Baker           | Uganda            | 31       | 5        | 2    | 1039 |
| Gebrecherkos    | Ethiopia 1        | 0        | 0        | 0    | 50   |
| Gebrecherkos    | Ethiopia 2        | 0        | 0        | 0    | 50   |
| Gebrecherkos    | Ethiopia 3        | 0        | 0        | 0    | 50   |
| Gebrecherkos    | Ethiopia 4        | 2        | 0        | 0    | 48   |
| Mboumpa Bouassa | Central Afr Rep 1 | 3        | 0        | 0    | 97   |
| Mboumpa Bouassa | Central Afr Rep 2 | 8        | 0        | 0    | 92   |
| Lapidus         | Cameroon          | 0        | 2        | 2    | 15   |
| Lapidus         | Senegal 1         | 7        | 20       | 33   | 60   |
| Lapidus         | Senegal 2         | 17       | 6        | 39   | 5    |
| Lapidus         | Burkina Fasso 1   | 3        | 14       | 7    | 64   |
| Lapidus         | Burkina Fasso 2   | 5        | 3        | 7    | 10   |
| Lapidus         | Ghana             | 3        | 19       | 18   | 5    |

**Supplementary Table 4. Data on *Plasmodium* parasitemia (Par) and anti-SARS-CoV-2 antibodies (Ab)**

| AUTHOR     | Ab+Par+ | Ab-Par+ | Ab+/Par- | Ab-Par- |
|------------|---------|---------|----------|---------|
| Emmerich 1 | 9       | 46      | 5        | 90      |
| Emmerich 2 | 6       | 49      | 6        | 89      |
| Emmerich 3 | 12      | 43      | 12       | 83      |
| Emmerich 4 | 1       | 54      | 6        | 89      |

**Supplementary Table 5. Data on HIV status and anti-SARS-CoV-2 antibodies (Ab)**

| AUTHOR       | Ab+HIV+ | Ab-HIV+ | Ab+HIV- | Ab-HIV- |
|--------------|---------|---------|---------|---------|
| Tso Tanzania | 0       | 7       | 18      | 80      |
| Tso Zambia   | 5       | 38      | 8       | 48      |
| Baker Uganda | 17      | 442     | 21      | 597     |

### Supplementary references – Excluded studies [with reason for exclusion]

1. Lutalo T, Nalumansi A, Olara D, Kayiwa J, Ogwang B, Odwilo E, Watera C, Balinandi S, Kiconco J, Nakasegu J, Serwanga J, Kikaire B, Ssemwanga D, Abiko B, Nsereko C, Cotten M, Buule J, Lutwama J, Downing R, Kaleebu P. Evaluation of the performance of 25 SARS-CoV-2 serological rapid diagnostic tests using a reference panel of plasma specimens at the Uganda Virus Research Institute. *Int J Infect Dis.* 2021 Nov;112:281-287. [Excluded pre-pandemic samples positive by other assays]
2. Matefo L, Cloete VV, Armand BP, Dominique G, Samantha P, John F, Craig T, Daniel W, Theresa L, Sunetra G, Maréza B, Danelle VJ, Jane BF. Validation of laboratory developed serology assays for detection of IgG antibody to severe acute respiratory syndrome coronavirus 2 in the South African population. *J Virol Methods.* 2022 Sep;307:114571. [Calibration]
3. Nyagwange J, Kutima B, Mwai K, Karanja HK, Gitonga JN, Mugo D, Uyoga S, Tuju J, Ochola-Oyier LI, Ndungu F, Bejon P, Agweyu A, Adetifa IMO, Scott JAG, Warimwe GM. Comparative performance of WANTAI ELISA for total immunoglobulin to receptor binding protein and an ELISA for IgG to spike protein in detecting SARS-CoV-2 antibodies in Kenyan populations. *J Clin Virol.* 2022 Jan;146:105061. [Assays previously developed with calibration on African samples]
4. Wiens KE, Mawien PN, Rumunu J, et al. Seroprevalence of Severe Acute Respiratory Syndrome Coronavirus 2 IgG in Juba, South Sudan, 2020(1). *Emerg Infect Dis* 2021; 27(6): 1598-606. [Calibration]
5. Sisay A, Tesfaye A, Desale A, Ataro I, Woldesenbet Z, Nigusse B, Tayachew A, Kebede A, Desta AF. Diagnostic Performance of SARS-CoV-2 IgM/IgG Rapid Test Kits for the

- Detection of the Novel Coronavirus in Ethiopia. *J Multidiscip Healthc.* 2021 Jan 27;14:171-180. [No pre-pandemic samples]
6. Stoddard CI, Sung K, Ojee E, Adhiambo J, Begnel ER, Slyker J, Gantt S, Matsen FA 4th, Kinuthia J, Wamalwa D, Overbaugh J, Lehman DA. Distinct Antibody Responses to Endemic Coronaviruses Pre- and Post-SARS-CoV-2 Infection in Kenyan Infants and Mothers. *Viruses.* 2022 Jul 12;14(7):1517. [Pre-pandemic samples cannot be separated]
  7. Péré H, Mboumba Bouassa RS, Tonen-Wolyec S, Podglajen I, Veyer D, Bélec L. Analytical performances of five SARS-CoV-2 whole-blood finger-stick IgG-IgM combined antibody rapid tests. *J Virol Methods.* 2021 Apr;290:114067. [No African samples]
  8. Tazi S, Kabbaj H, Zirar J, Zouaki A, El Amin G, El Himeur O, Seffar M. Comparative Performance Evaluation of FilmArray BioFire RP2.1 and MAScIR 2.0 Assays for SARS-CoV-2 Detection. *Adv Virol.* 2022 Jun 1;2022:4510900. [No pre-pandemic samples, nucleic acid assays evaluated]
  9. Arinola OG, Edem VF, Rahamon SK, Yaqub SA, Fashina AO, Alonge TO. Sars-Cov-2 Infection Screening Using Two Serological Testing Methods. *Niger J Physiol Sci.* 2020 Dec 31;35(2):117-121. [No pre-pandemic samples]
  10. Gededzha MP, Mampeule N, Jugwanth S, Zwane N, David A, Burgers WA, Blackburn JM, Grove JS, George JA, Sanne I, Scott L, Stevens W, Mayne ES. Performance of the EUROIMMUN Anti-SARS-CoV-2 ELISA Assay for detection of IgA and IgG antibodies in South Africa. *PLoS One.* 2021 Jun 23;16(6):e0252317. [Pre-pandemic samples cannot be separated]

11. Hussein NA, Ali EAA, El-Hakim AE, Tabll AA, El-Shershaby A, Salamony A, Shaheen MNF, Ali I, Elshall M, Shahein YE. Assessment of specific human antibodies against SARS-CoV-2 receptor binding domain by rapid in-house ELISA. *Hum Antibodies*. 2022;30(2):105-115. [No pre-pandemic samples]
12. Deschermeier C, Ehmen C, von Possel R, Murawski C, Rushton B, Amuasi J, Sarpong N, Maiga-Ascofaré O, Rakotozandrindrainy R, Asogun D, Ighodalo Y, Oestereich L, Duraffour S, Pahlmann M, Emmerich P. Fcγ-Receptor-Based Enzyme-Linked Immunosorbent Assays for Sensitive, Specific, and Persistent Detection of Anti-SARS-CoV-2 Nucleocapsid Protein IgG Antibodies in Human Sera. *J Clin Microbiol*. 2022 Jun 15;60(6):e0007522. [Calibration]
13. Uyoga S, Adetifa IMO, Karanja HK, Nyagwange J, Tuju J, Wanjiku P, Aman R, Mwangangi M, Amoth P, Kasera K, Ng'ang'a W, Rombo C, Yegon C, Kithi K, Odhiambo E, Rotich T, Orgut I, Kihara S, Otiende M, Bottomley C, Mupe ZN, Kagucia EW, Gallagher KE, Etyang A, Voller S, Gitonga JN, Mugo D, Agoti CN, Otieno E, Ndwiga L, Lambe T, Wright D, Barasa E, Tsofa B, Bejon P, Ochola-Oyier LI, Agweyu A, Scott JAG, Warimwe GM. Seroprevalence of anti-SARS-CoV-2 IgG antibodies in Kenyan blood donors. *Science*. 2021 Jan 1;371(6524):79-82. [Calibration]
14. Crowell TA, Daud II, Maswai J, Owuoth J, Sing'oei V, Imbach M, Dear N, Sawe F, Eller LA, Polyak CS, Ake JA; AFRICOS Study Group. Severe acute respiratory syndrome coronavirus-2 antibody prevalence in people with and without HIV in rural Western Kenya, January to March 2020. *AIDS*. 2021 Nov 15;35(14):2401-2404. [No pre-pandemic samples]

15. Meinus C, Singer R, Nandi B, Jagot O, Becker-Ziaja B, Karo B, Mvula B, Jansen A, Baumann J, Schultz A. SARS-CoV-2 prevalence and immunity: a hospital-based study from Malawi. *Int J Infect Dis.* 2022 Mar;116:157-165. [Calibration]
16. Bonguili NCB, Fritz M, Lenguiya LH, Mayengue PI, Koukouikila-Koussounda F, Dossou-Yovo LR, Badzi CN, Leroy EM, Niama FR. Early Circulation of SARS-CoV-2, Congo, 2020. *Emerg Infect Dis.* 2022 Apr;28(4):878-880. [Calibration]
